# Supplementary material
Source: MDPI journal article supplement (https://www.mdpi.com/1999-4907/10/9/817)
Supplement: s1 [file s1]

**Table S1.** The information of point years at each site

|      | TLG1 | TLG2 | SDL1 | SDL2 | SDL3 | SDL4 | LCH1 | LCH2 | QKD |
|------|------|------|------|------|------|------|------|------|-----|
| 1971 |      |      | *    | *    | *    | *    |      |      |     |
| 1972 |      |      | *    | *    |      |      |      |      |     |
| 1973 |      |      | *    | *    |      |      |      |      |     |
| 1995 |      |      |      |      | *    | *    |      |      | *   |
| 2001 |      |      |      |      | *    | *    | *    | *    | *   |
| 2002 | *    | *    |      |      |      |      |      |      |     |

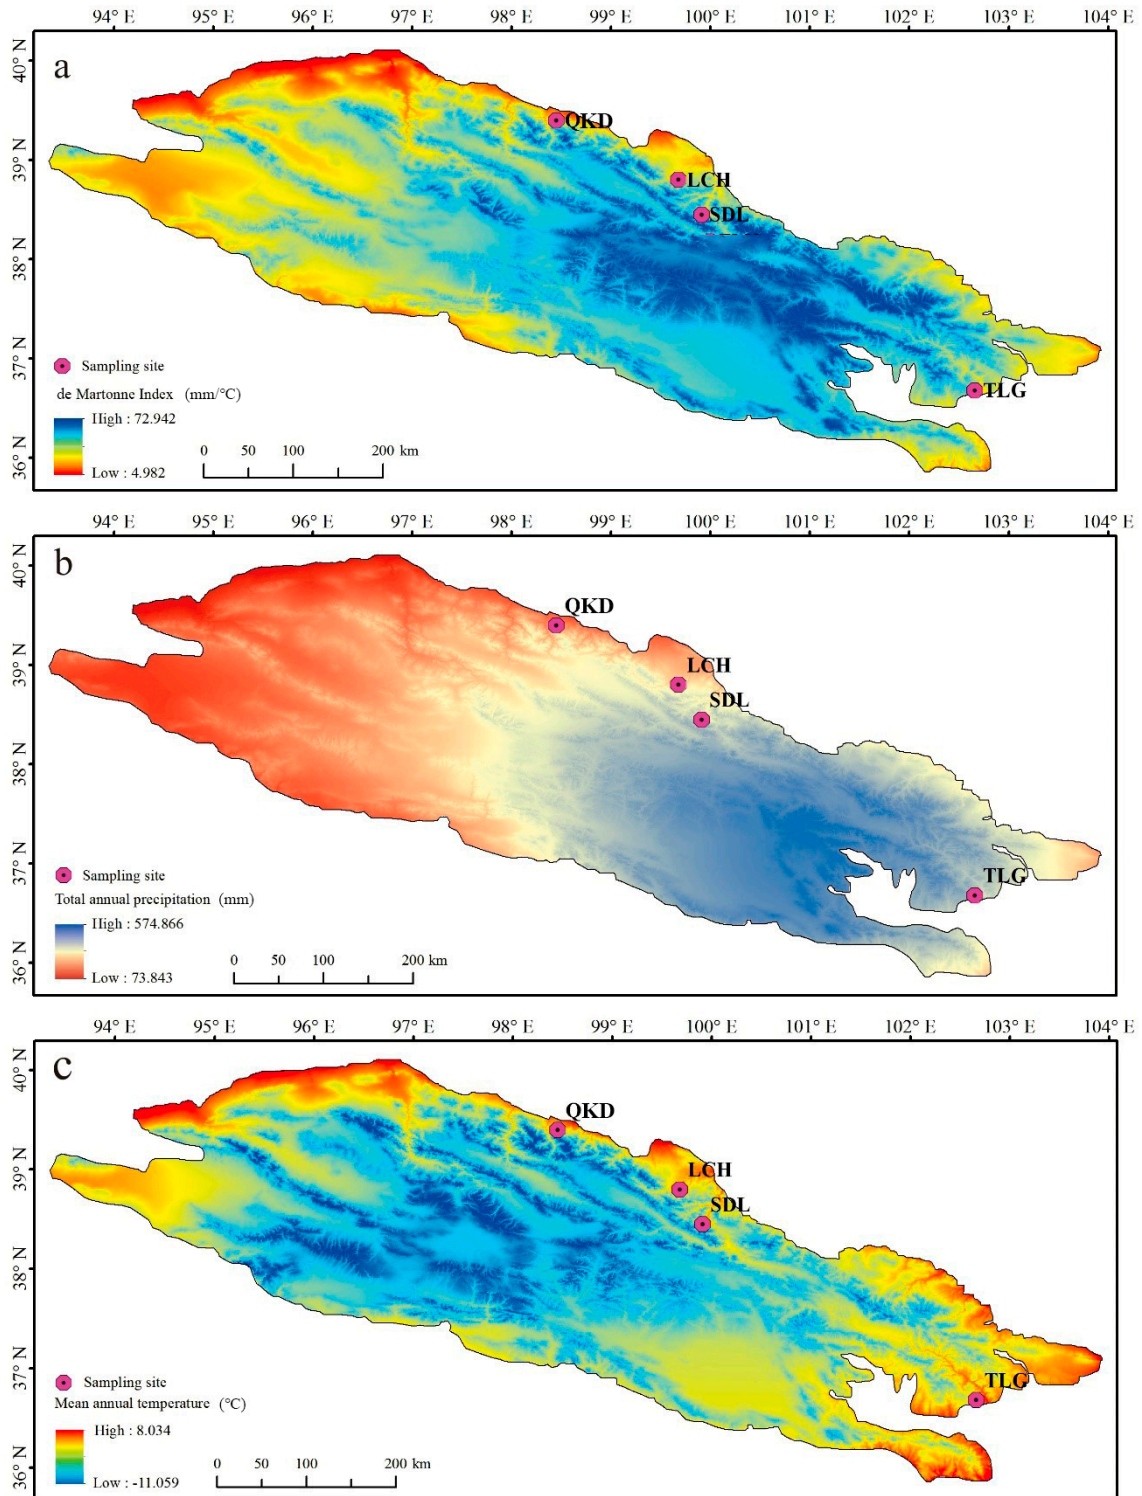

**Figure S1.** The de Martonne Index (a), the total annual precipitation (b) and mean annual temperature (c) during 1959-2013 in the Qilian Mountains

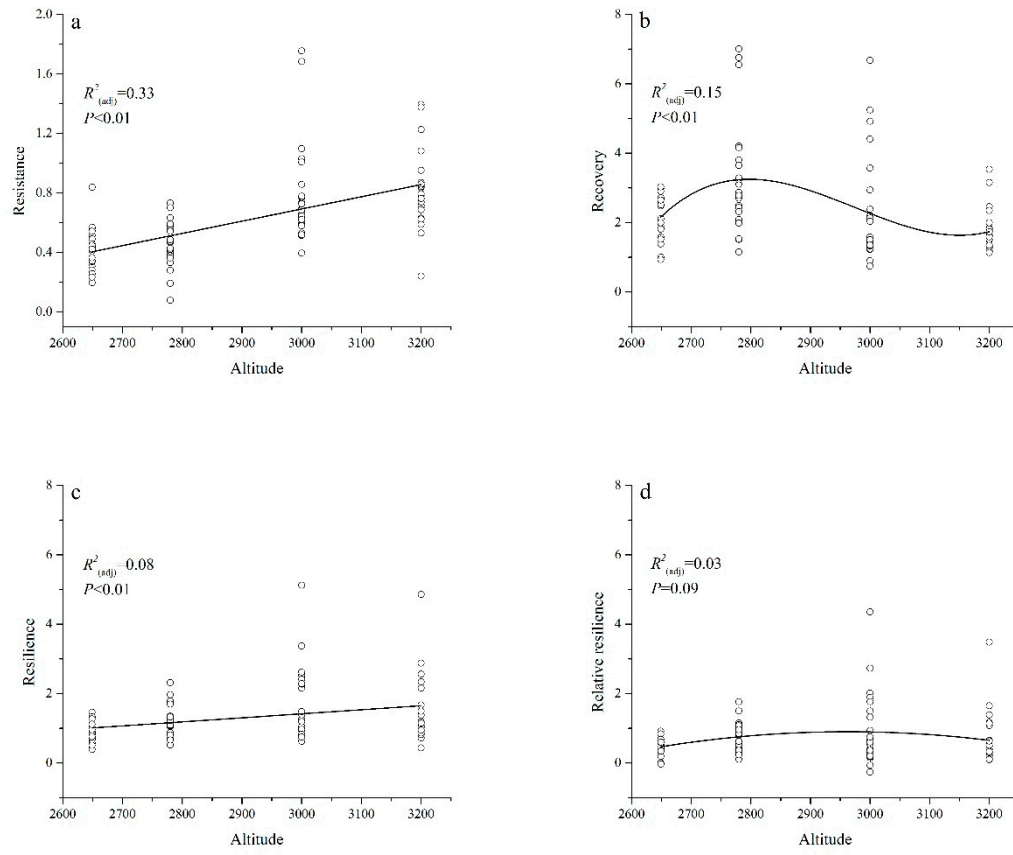

**Figure S2.** The relationships between the resilience indices (a: resistance, b: recovery, c: resilience, d: relative resilience) and altitudes reflected by the linear fitting or polynomial fitting
